# Supplementary material
Source: Springer Nature journal article supplement (https://www.springermedizin.de/resource/supplementary/12877_2009_177_MOESM2_ESM.pdf/9441336)

**Density  
distribution  
(%)**

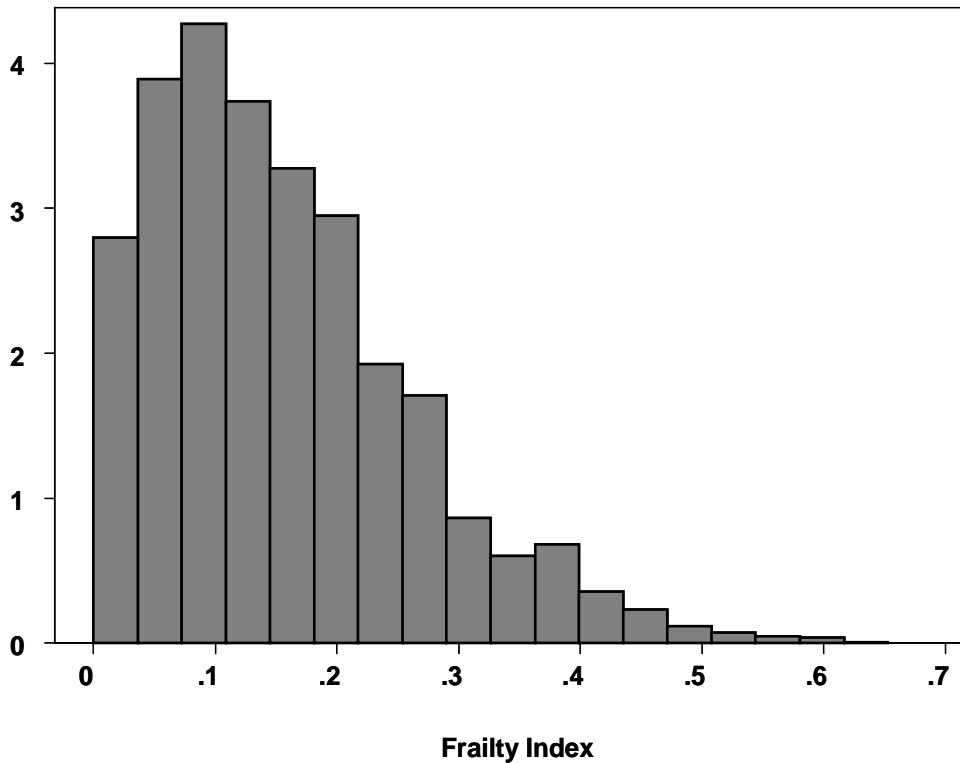

Supplement: MOESM2 [file 9441336]
